# Supplementary material
Source: HighWire-hosted journal article supplement (http://www.cmaj.ca/highwire/filestream/58542/field_highwire_adjunct_files/0/kuhnian-fox-1-at.pdf)

**Appendix 1 (as supplied by the author): The five vascular abnormalities identified as causing chronic cerebrospinal venous insufficiency and included in the diagnostic criteria of Zamboni and colleagues. Reprinted with permission, Cleveland Clinic Center for Medical Art & Photography © 2010–2011. All rights reserved.**

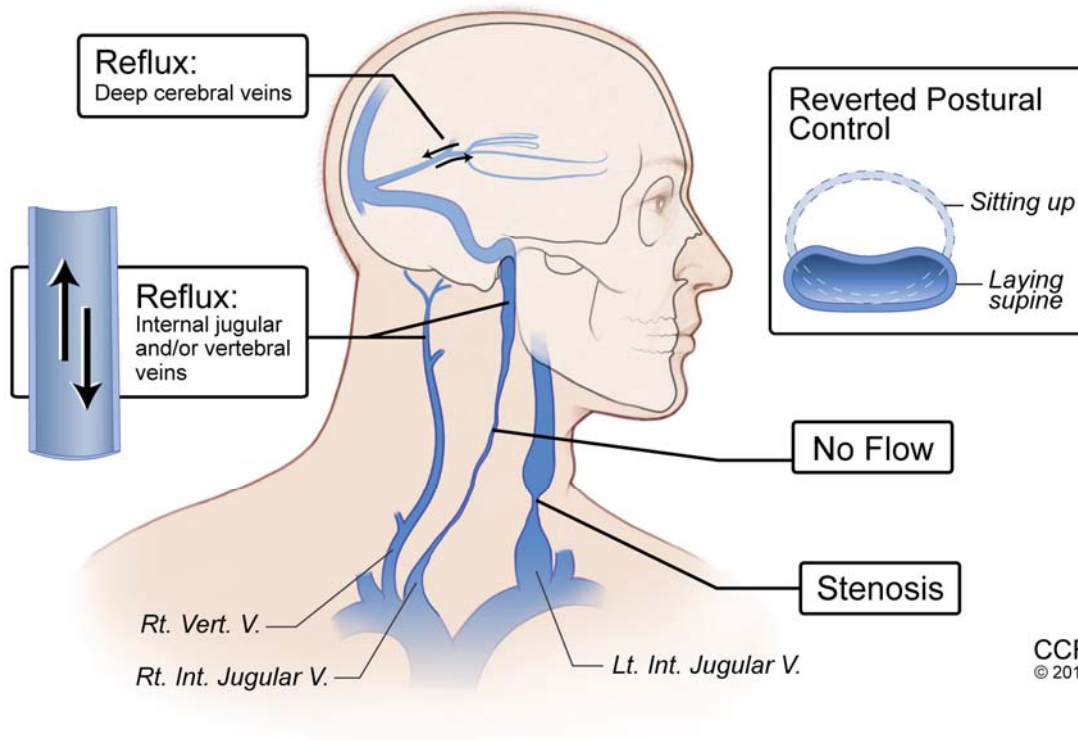

Supplement: kuhnian-fox-1-at.pdf [file kuhnian-fox-1-at.pdf]
